# Supplementary material for: Interleukin‐37 improves T‐cell‐mediated immunity and chimeric antigen receptor T‐cell therapy in aged backgrounds
Source: PubMed Central journal article supplement (PMC7884049; doi:10.1111/acel.13309), 2021-01-22
Supplement: ACEL-20-e13309-s001.pdf [file ACEL-20-e13309-s001.pdf]

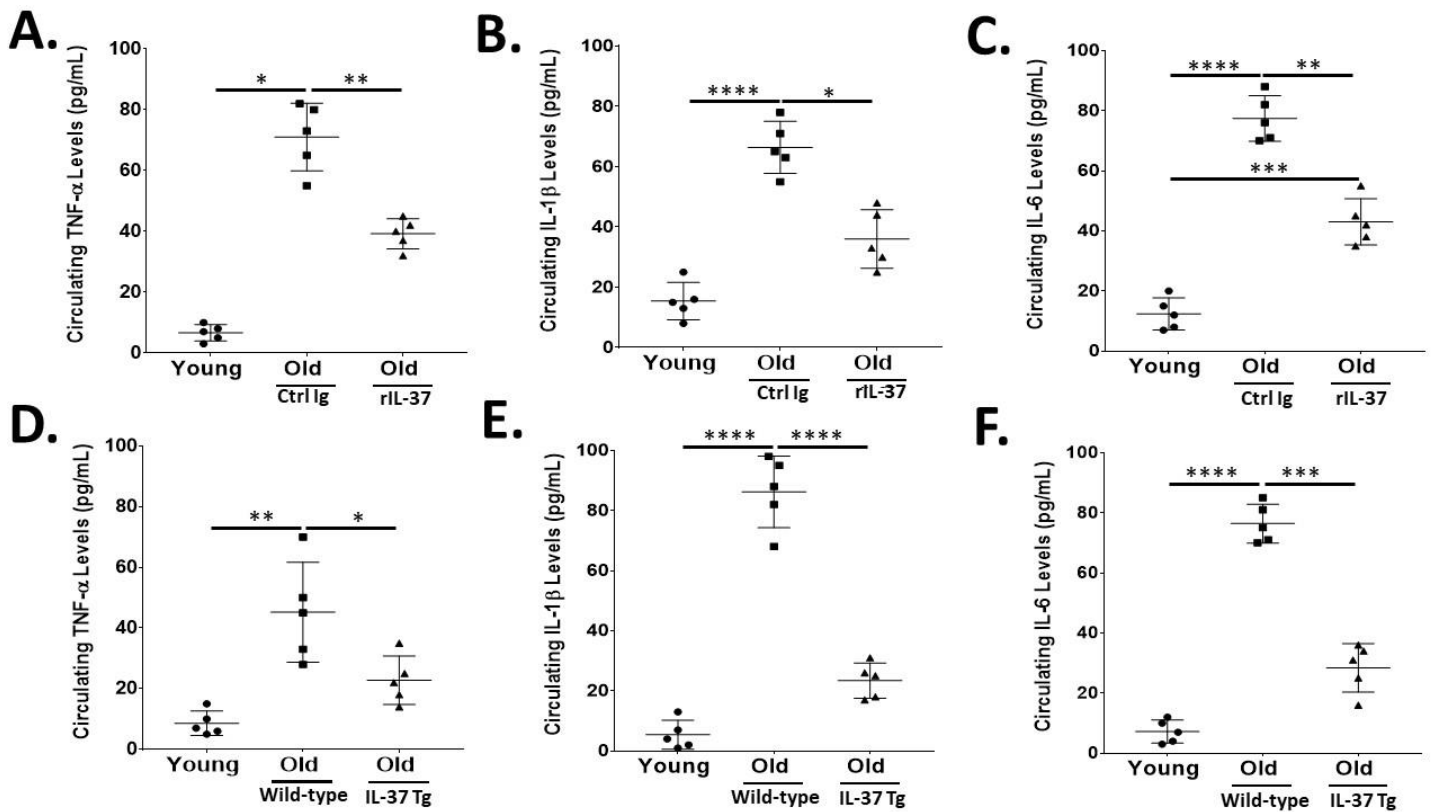

**Figure S1. Transgenic Expression of and Treating Aged Mice with Interleukin-37 Abrogates Aging-associated Chronic Inflammation.** (A-C) Aged (24 months old) mice were treated with Ctrl Ig and rIL-37 intravenously every 2 days for 2 weeks. Serum was collected from mice and circulating levels of TNF- $\alpha$ , IL-1 $\beta$ , and IL-6 were determined via ELISA analysis. (D-F) Serum was collected from aged (24 months old) wild-type and IL-37tg mice, and ELISA analysis was performed to determine the circulating levels of TNF- $\alpha$ , IL-1 $\beta$ , and IL-6. Means  $\pm$  s.d. are shown with \* $p$ <0.05, \*\* $p$ <0.01, \*\*\* $p$ <0.001, and \*\*\*\* $p$ <0.0001 determined using a one-way ANOVA with Tukey's post-test. n=5 mice/group.

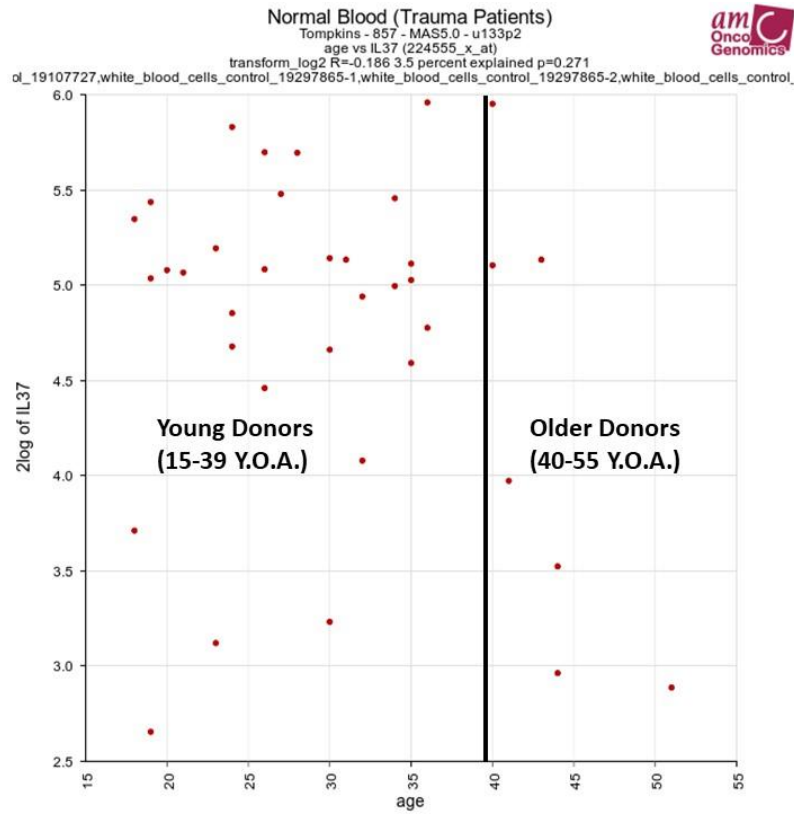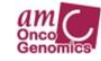

**Figure S2. *IL-37* gene expression levels in leukocytes isolated from young and middle-aged healthy donors.** The R2 Database was utilized to determine the gene expression levels of *IL-37* across age ranges. The database used was from Tompkins study, where 37 healthy control samples were used to determine the gene expression levels of *IL-37* in leukocytes. The GEO ID of the Tompkins study is gse36809.

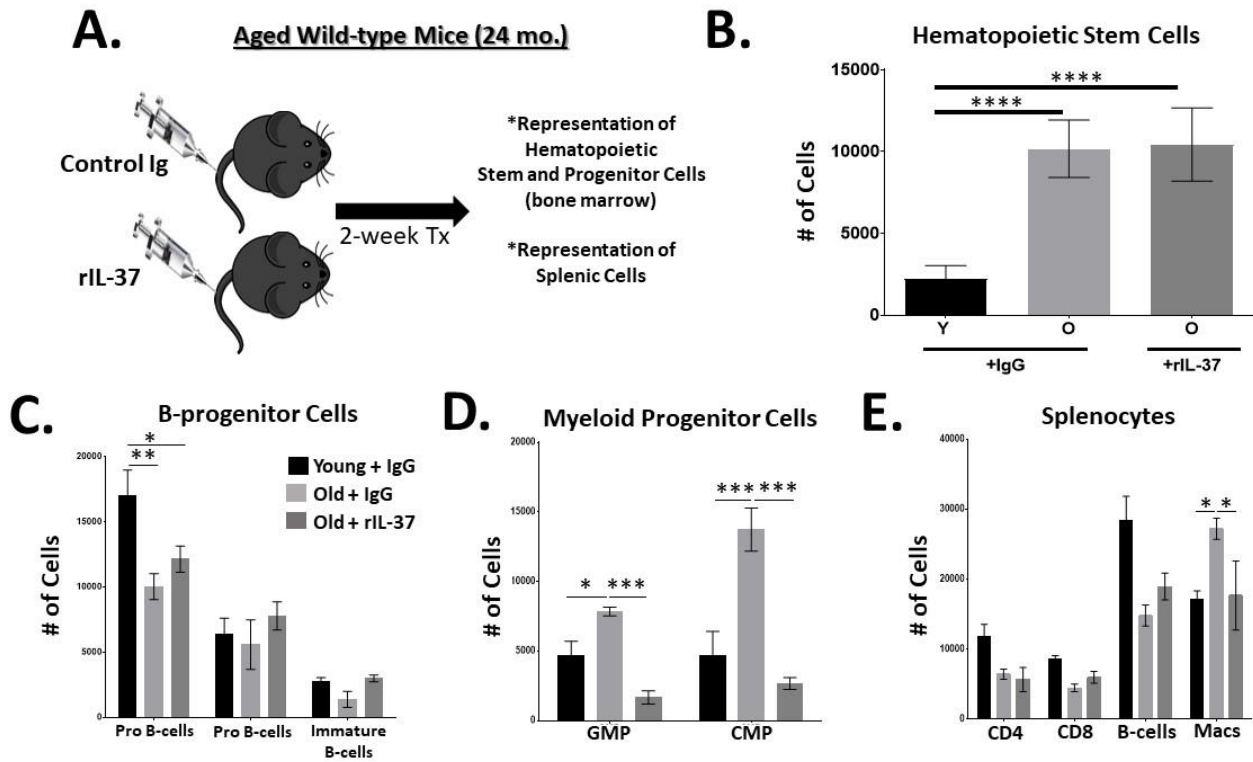

**Figure S3. Treating aged mice with recombinant Interleukin-37 suppresses aging-associated increases in myelopoiesis.** (A) Aged (24 months old) C57BL/6 wild-type mice were treated with control immunoglobulin (Control Ig) or recombinant IL-37 (rIL-37) every other day for 2 weeks to assess global changes in immunity. (B-D) Bone marrow was isolated from sacrificed mice to determine the representation of hematopoietic stem cells, B-progenitor cells, and myeloid progenitor cells [GMP: Granulocyte-monocyte progenitors/CMP: Common myeloid progenitors] using flow cytometric analysis. (E) Spleens were isolated to determine the representation of T-cells (CD4<sup>+</sup> and CD8<sup>+</sup>), B-cells, and macrophages (Macs) using flow cytometric analysis. Means + s.d. are shown with \* $p < 0.05$ , \*\* $p < 0.01$ , \*\*\* $p < 0.001$ , and \*\*\*\* $p < 0.0001$  determined using a one-way ANOVA with Tukey's post-test in B-E.  $n = 5$  mice/group.

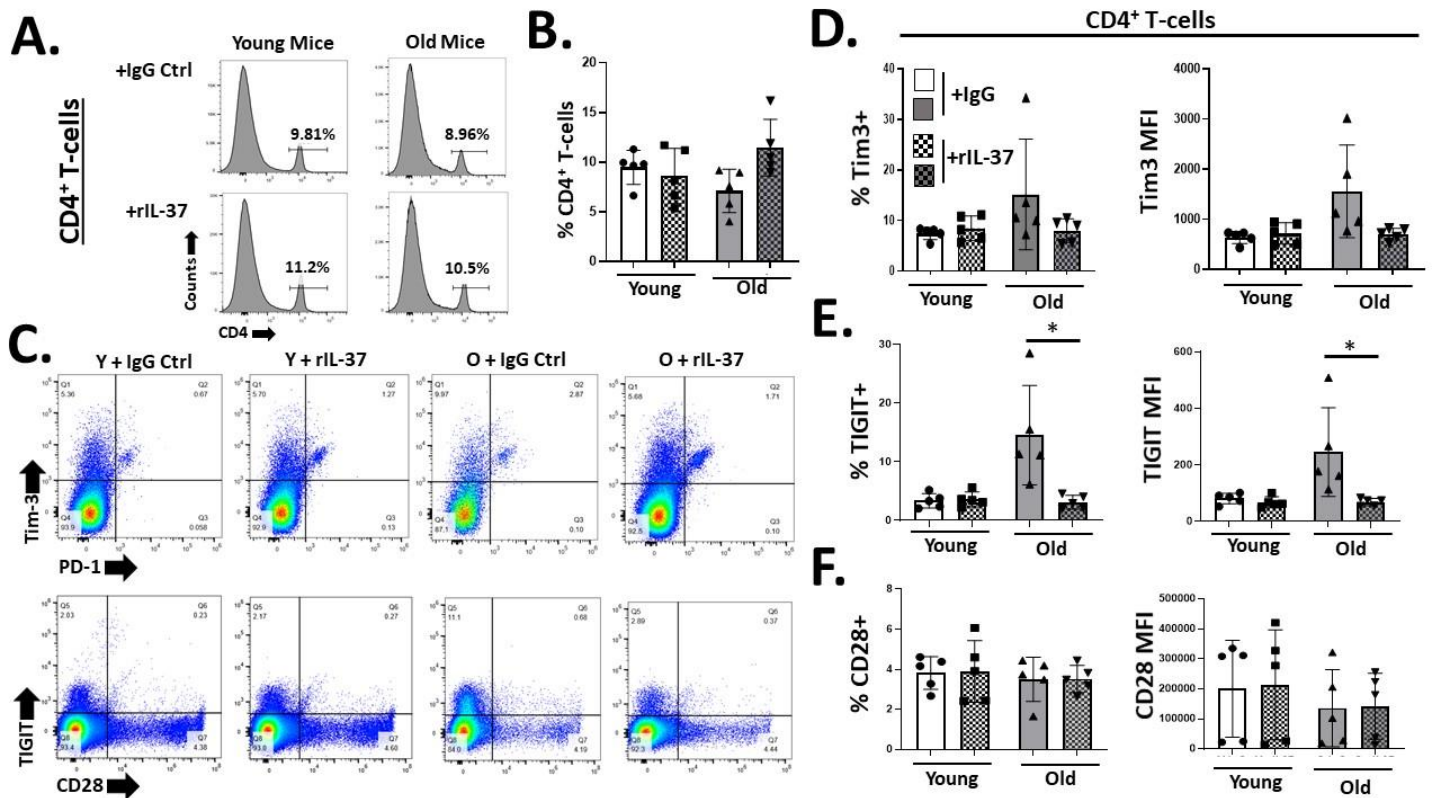

**Figure S4. Recombinant IL-37 treatment of aged mice reduces TIGIT expression on naïve CD4<sup>+</sup> T-cells.** Aged (24 months old) C57BL/6 wild-type mice were treated with control immunoglobulin (Control Ig) or recombinant IL-37 (rIL-37) every other day for 2 weeks to assess global changes in immunity. (A-B) Splenocytes were harvested from treated mice, and stained to enumerate the percent of T-helper cells via flow cytometric analysis. (C-F) Naïve Thelper cells were also stained to assess their surface expression of immunoinhibitory (Tim-3, PD-1, and TIGIT) and costimulatory (CD28) receptors. The percent and MFI of these receptors in D-F are shown as means  $\pm$  s.d. with \* $p$ <0.05. Significance was determined using the Student's t-test relative to young + IgG or old + IgG controls with  $n=5$  mice/group.

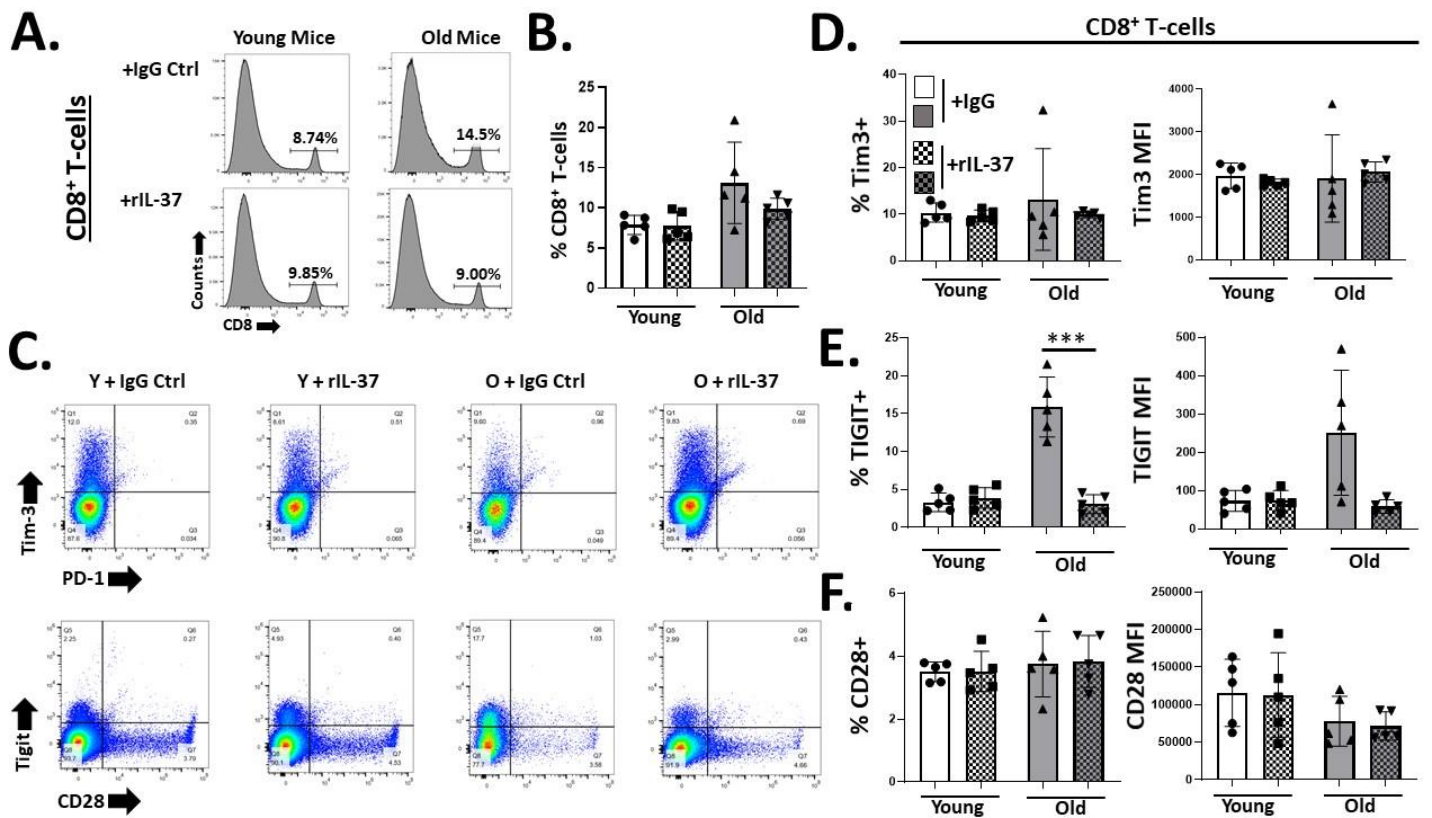

**Figure S5. Recombinant IL-37 treatment of aged mice reduces TIGIT expression on naïve CD8<sup>+</sup> T-cells.** Aged (24 months old) C57BL/6 wild-type mice were treated with control immunoglobulin (Control Ig) or recombinant IL-37 (rIL-37) every other day for 2 weeks to assess global changes in immunity. (A-B) Splenocytes were harvested from treated mice, and stained to enumerate the percent of cytotoxic lymphocytes cells via flow cytometric analysis. (C-F) Naïve cytotoxic lymphocytes were also stained to assess their surface expression of immunoinhibitory (Tim-3, PD-1, and TIGIT) and costimulatory (CD28) receptors. The percent and MFI of these receptors in D-F are shown as means  $\pm$  s.d. with \* $p$ <0.05. Significance was determined using the Student's t-test relative to young + IgG or old + IgG controls with  $n=5$  mice/group.

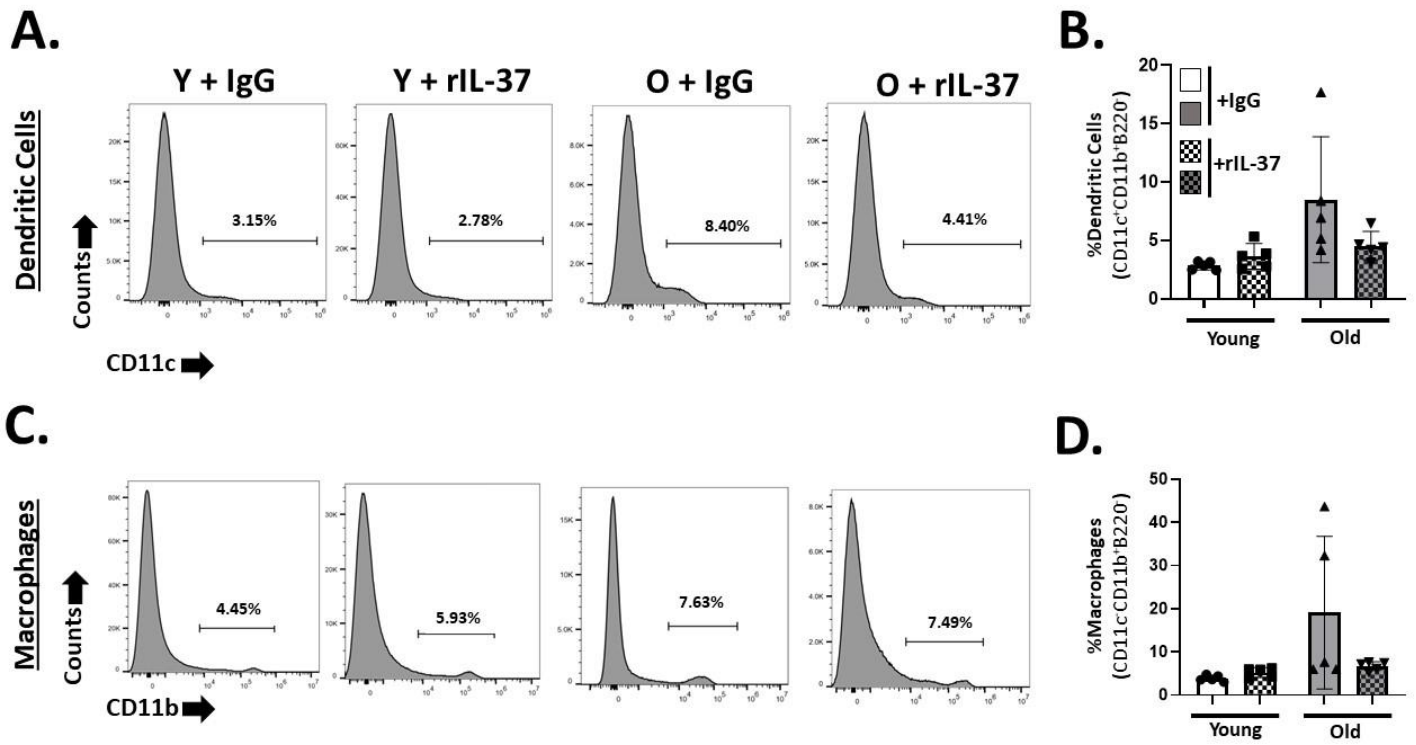

**Figure S6. Recombinant IL-37 treatment of aged mice reduces the percentage of splenic-derived myeloid cells.** Aged (24 months old) C57BL/6 wild-type mice were treated with control immunoglobulin (Control Ig) or recombinant IL-37 (rIL-37) every other day for 2 weeks to assess global changes in immunity. (A-B) Splenocytes were harvested from treated mice, and stained to enumerate the percent of conventional dendritic cells (CD11c<sup>+</sup>/CD11b<sup>+</sup>/B220<sup>-</sup>, A and B) and macrophages (CD11c<sup>-</sup>/CD11b<sup>+</sup>/B220<sup>-</sup>, C and D) via flow cytometric analysis. The means  $\pm$  s.d. are shown in B and D with n=5 mice/group.

**A.**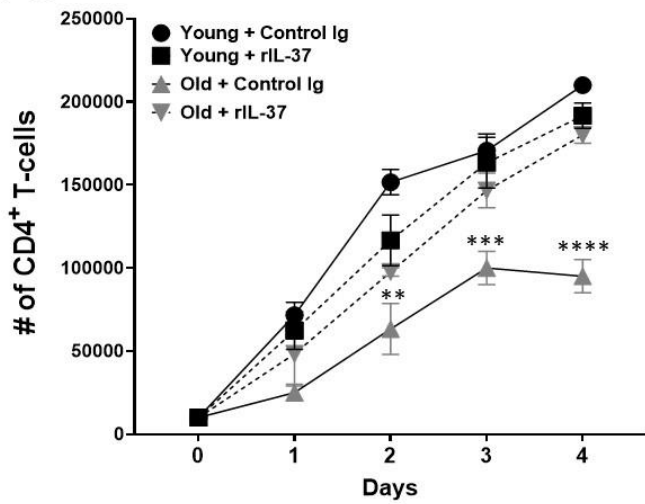**B.**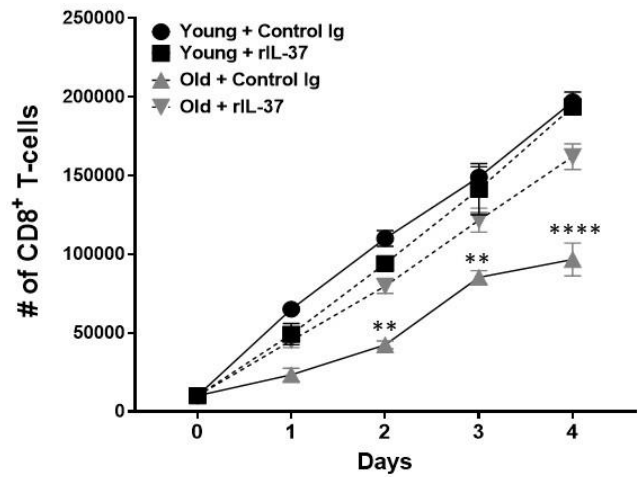

**Figure S7. Recombinant IL-37 treatment abrogates aged T-cell exhaustion leading to a youthful proliferative capacity.** Aged (24 months old) C57BL/6 wild-type mice were treated with control immunoglobulin (Control Ig) or recombinant IL-37 (rIL-37) every other day for 2 weeks. Purified T-cells were stimulated *ex vivo* with  $\alpha$ CD3/ $\alpha$ CD28 antibody stimulation. T-cells were plated at  $2 \times 10^4$  cells/well on Day 0, and the total number of cells were enumerated each day for 4 days via trypan blue exclusion assays. The means  $\pm$  s.d. are shown for each time point. Significance was determined using the Student's t-test relative to young + control Ig group with  $n=5$  mice/group.

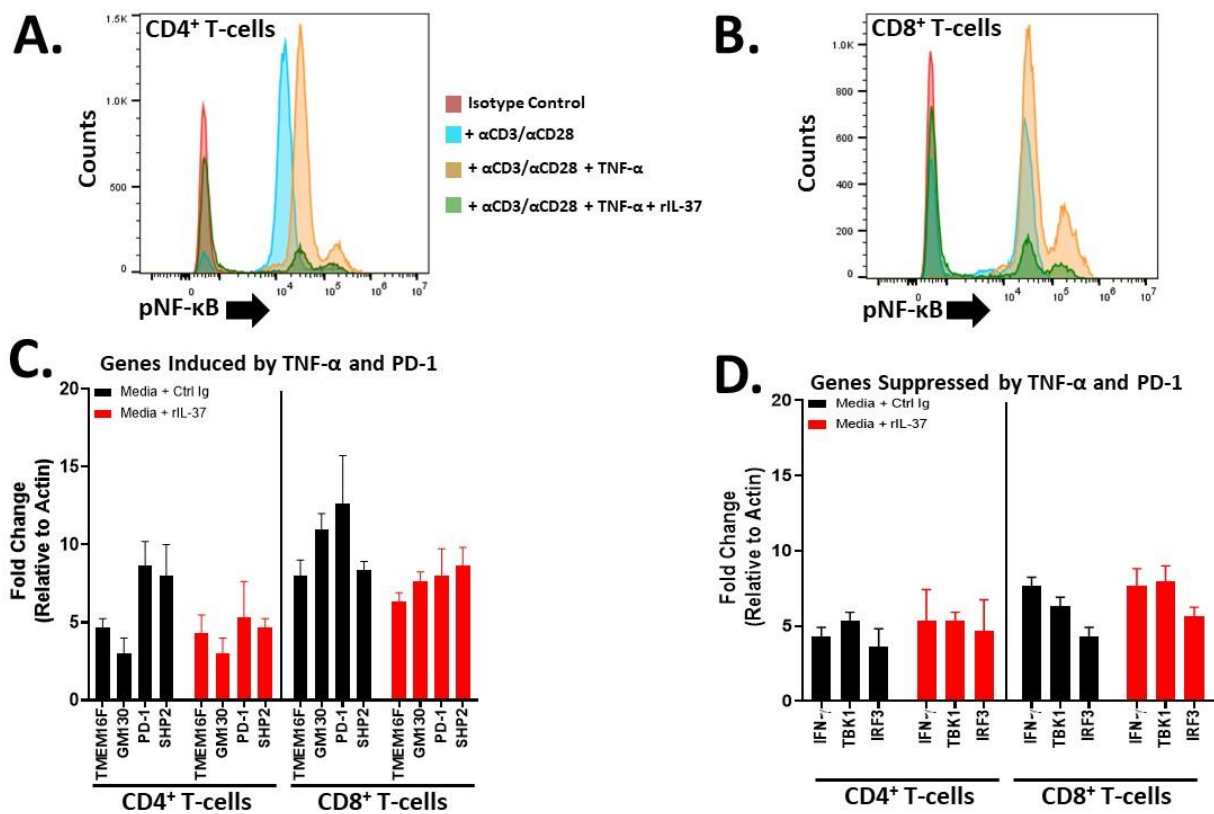

**Figure S8. Recombinant IL-37 treatment opposes TNF- $\alpha$  signaling in aged, but not young, T-cells.** Naïve CD4<sup>+</sup> and CD8<sup>+</sup> T-cells were purified from aged (24 months old) C57BL/6 mice via MACs selection and stimulated *in vitro* with  $\alpha$ CD3/ $\alpha$ CD28 in the presence Control Ig, rTNF- $\alpha$ , or rTNF- $\alpha$  + rIL-37. (A and B) After 10' of stimulation, phospho-flow cytometry was performed to determine NF- $\kappa$ B activation. Representative data are shown. (C and D) The experiment described above was performed on naïve T-cells purified from young (2 months old) C57BL/6 mice. Naïve T-cells were stimulated with Control Ig or rIL-37 for 4 hours. After the stimulation period, qPCR analysis was performed to ascertain the expression levels of genes involved in T-cell activation (IFN- $\gamma$ , TBK1, IRF3) and inhibition (TMEM16F, GM130, SHP2, and PD1). Means  $\pm$  s.d. are shown with n=9 mice/group (3 independent experiments were conducted).



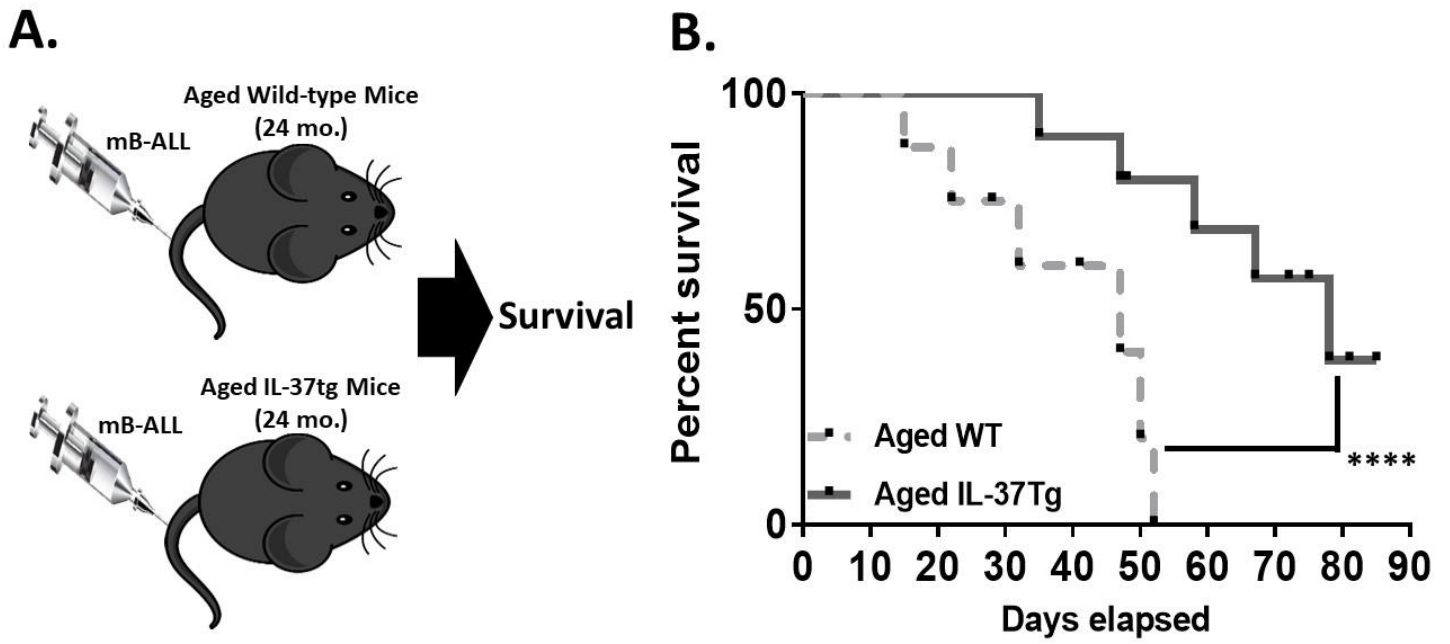

**Figure S9. Interleukin-37 protects against B-cell acute lymphoblastic leukemia pathogenesis.** (A) C57BL/6 wild-type and IL-37 transgenic mice were aged for 24 months, inoculated intravenously with BCR-ABL1<sup>+</sup> *Arf*<sup>-/-</sup> murine B-ALL cells (mB-ALL) and (B) survival was monitored. Significance in B was determined using the log-rank test with \*\*\*\* $p < 0.0001$ .  $n = 10$  mice/group.

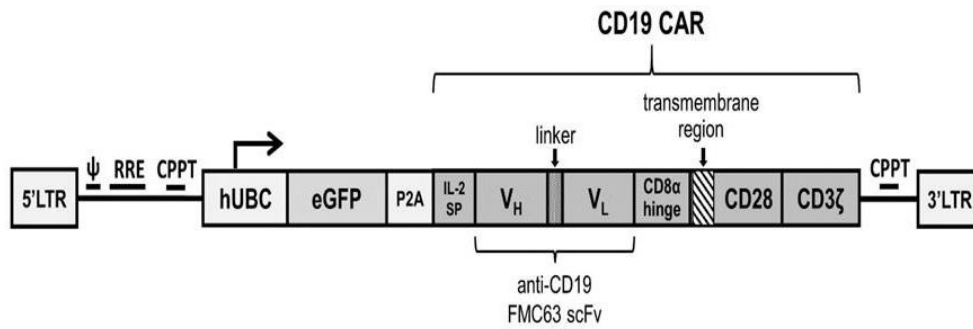

**Figure S10.** Schematic of the bicistronic construct encoding enhanced green fluorescent protein (eGFP) and the CD19-CAR. The transgene includes a 5' long terminal repeat (LTR), human ubiquitin C promoter (hUGC), eGFP, a P2A sequence, the CD19-CAR and a 3' LTR. Our second generation CD19-CAR consists of an interleukin-2 signal peptide (IL-2 SP), the anti-CD19 FMC63 single chain variable fragment (scFv), a CD8 alpha hinge region, the transmembrane and intracellular domains of CD28, and the CD3-ζ intracellular signaling domain.
